# Supplementary material for: Insight into aqueous electrolyte additives: unraveling functional principles, electrochemical performance, and beyond
Source: Royal Society of Chemistry journal article supplement (doi:10.1039/d4gc02619e), 2024-01-01
Supplement: d4gc02619e1.pdf [file d4gc02619e1.pdf]

## Supporting information

### Insight into Aqueous Electrolyte Additives: Unraveling Functional Principles, Electrochemical Performance, and Beyond

Zhuo Chen<sup>#, [a]</sup>, Junrun Feng<sup>#[a]</sup>, Pengfei Yao<sup>[a]</sup>, Jinlong Cai<sup>[a]</sup>, Zhangxiang Hao<sup>\*, [a]</sup>

[a] School of Science, School of Chip Industry, Hubei University of Technology, Wuhan, Hubei 430068, China

\*Corresponding author. E-mail: [haozx@hbut.edu.cn](mailto:haozx@hbut.edu.cn)

# The authors contributed to the paper equally.

Table S1. The pH buffer electrolyte additive and equation.

| Cathode                                        | Electrolyte       | Additive                                                      | Potential | Equation                                                                                                                                              | Ref |
|------------------------------------------------|-------------------|---------------------------------------------------------------|-----------|-------------------------------------------------------------------------------------------------------------------------------------------------------|-----|
| NH <sub>4</sub> V <sub>4</sub> O <sub>10</sub> | ZnSO <sub>4</sub> | Taurine                                                       | 0.2~1.6   | N <sub>2</sub> H-(CH <sub>2</sub> ) <sub>2</sub> ↔H <sub>2</sub> N-(CH <sub>2</sub> ) <sub>2</sub> -SO <sub>3</sub> H                                 | 1   |
|                                                |                   |                                                               |           | H <sub>2</sub> N-(CH <sub>2</sub> ) <sub>2</sub> -SO <sub>3</sub> H↔H <sub>3</sub> N <sup>+</sup> -(CH <sub>2</sub> ) <sub>2</sub> -SO <sub>3</sub> H |     |
|                                                |                   |                                                               |           | S <sub>2</sub> O <sub>8</sub> <sup>2-</sup> +H <sub>2</sub> O↔2HSO <sub>4</sub> <sup>2-</sup> +H <sub>2</sub> O <sub>2</sub>                          |     |
| NH <sub>4</sub> V <sub>4</sub> O <sub>10</sub> | ZnSO <sub>4</sub> | (NH <sub>4</sub> ) <sub>2</sub> S <sub>2</sub> O <sub>8</sub> | 0.2~1.6   | S <sub>2</sub> O <sub>8</sub> <sup>2-</sup> +H <sup>+</sup> ↔HS <sub>2</sub> O <sub>8</sub> <sup>-</sup>                                              | 2   |
|                                                |                   |                                                               |           | NH <sub>4</sub> <sup>+</sup> +OH <sup>-</sup> ↔NH <sub>3</sub> ·H <sub>2</sub> O                                                                      |     |
|                                                |                   |                                                               |           | H <sub>2</sub> PO <sub>4</sub> <sup>-</sup> +OH <sup>-</sup> ↔HPO <sub>4</sub> <sup>2-</sup> +H <sub>2</sub> O                                        |     |
| MnO <sub>2</sub>                               | ZnSO <sub>4</sub> | NH <sub>4</sub> H <sub>2</sub> PO <sub>4</sub>                | 0.8~1.8   | H <sub>2</sub> PO <sub>4</sub> <sup>-</sup> +H <sup>+</sup> ↔H <sub>3</sub> PO <sub>4</sub>                                                           | 3   |
|                                                |                   |                                                               |           | NH <sub>4</sub> <sup>+</sup> +OH <sup>-</sup> ↔NH <sub>3</sub> ·H <sub>2</sub> O                                                                      |     |
|                                                |                   |                                                               |           | CH <sub>3</sub> COO <sup>-</sup> +H <sup>+</sup> ↔CH <sub>3</sub> COOH                                                                                |     |
| Od-NVO                                         | ZnSO <sub>4</sub> | NH <sub>4</sub> OAc                                           | 0.3~1.8   | CH <sub>3</sub> COOH+OH <sup>-</sup> ↔CH <sub>3</sub> COO <sup>-</sup> +H <sub>2</sub> O                                                              | 4   |
|                                                |                   |                                                               |           | CH <sub>3</sub> COO <sup>-</sup> +H <sup>+</sup> ↔CH <sub>3</sub> COOH                                                                                |     |
| MnO <sub>2</sub>                               | ZnSO <sub>4</sub> | CH <sub>3</sub> COONH <sub>4</sub>                            | 0.8~1.8   | CH <sub>3</sub> COOH+OH <sup>-</sup> ↔CH <sub>3</sub> COO <sup>-</sup> +H <sub>2</sub> O                                                              | 5   |
|                                                |                   |                                                               |           | CH <sub>3</sub> COO <sup>-</sup> +H <sup>+</sup> ↔CH <sub>3</sub> COOH                                                                                |     |

Table S2. Mechanism of desolvation sheaths electrolyte additives.

| Cathode                                                             | Electrolyte                                        | Additive     | Potential | Mechanism                                                                              | Ref |
|---------------------------------------------------------------------|----------------------------------------------------|--------------|-----------|----------------------------------------------------------------------------------------|-----|
| Na <sub>0.92</sub> V <sub>2</sub> O <sub>5</sub> ·nH <sub>2</sub> O | Zn (CF <sub>3</sub> SO <sub>3</sub> ) <sub>2</sub> | Fibroin (FI) | 0.4~1.5   | Interaction of FI electron groups with H <sub>2</sub> O regulates the Zn <sup>2+</sup> | 6   |

|                         |                  |           |         |                                                                                                            |    |
|-------------------------|------------------|-----------|---------|------------------------------------------------------------------------------------------------------------|----|
|                         |                  |           |         | coordination                                                                                               |    |
| $H_{11}Al_2V_6O_{23.2}$ | $Zn(CF_3SO_3)_2$ | [BMIM]OTF | 0.4~1.4 | Additives preferentially adsorb at the electrodes, regulating $Zn^{2+}$ solvation sheaths                  | 7  |
| $VS_2$                  | $ZnSO_4$         | NMP       | 0.4~1.0 | Polar additives contribute to structural remodeling of $Zn^{2+}$ solvation sheaths                         | 8  |
| $MnO_2$                 | $ZnSO_4$         | TG        | 0.8~1.8 | TG is involved in $Zn^{2+}$ solvation sheaths reorganization                                               | 9  |
| $MnO_2$                 | $ZnSO_4$         | CTAB      | 0.8~1.8 | CTAB alters the solvated structure of $Zn^{2+}$ and increased interfacial stability                        | 10 |
| $NH_4V_4O_{10}$         | $Zn(CF_3SO_3)_2$ | TMU       | 0.2~1.6 | Remodeling of $Zn^{2+}$ solvation structure through group formation interactions with $Zn^{2+}$ and $H_2O$ | 11 |

Table S3. Electrolyte additives for SEI formation.

| Cathode              | Electrolyte | Additive       | Potential | Mechanism                                                                                         | Ref |
|----------------------|-------------|----------------|-----------|---------------------------------------------------------------------------------------------------|-----|
| $V_2O_5$             | $ZnSO_4$    | [EMIM]OTF      | 0.2~1.6   | OTF <sup>-</sup> ions constitute the SEI, mitigating side reactions and zinc dendrite formation   | 12  |
| $MnO_2$              | $ZnSO_4$    | DPA            | 0.8~1.8   | DPA preferentially adsorbs at the zinc anode and forms SEI, and $Zn^{2+}$ is uniformly deposited  | 13  |
| Mn-doped $V_6O_{13}$ | $ZnSO_4$    | Succinonitrile | 0.2~1.6   | SN has a higher affinity for SEI and forms dense SEI on the zinc anode surface                    | 14  |
| $V_2O_5$             | $ZnSO_4$    | TMB            | 0.2~1.6   | The TMB forms a $ZnF_2$ SEI layer that isolates the zinc anode from the $H_2O$ in the electrolyte | 15  |

|                                                |                                                    |                                    |         |                                                                                                                                                                  |    |
|------------------------------------------------|----------------------------------------------------|------------------------------------|---------|------------------------------------------------------------------------------------------------------------------------------------------------------------------|----|
| MnO <sub>2</sub>                               | Zn (CF <sub>3</sub> SO <sub>3</sub> ) <sub>2</sub> | Zn (NO <sub>3</sub> ) <sub>2</sub> | 0.8~1.8 | Formation of inorganic ZnF <sub>2</sub> -Zn <sub>5</sub> (CO <sub>3</sub> ) <sub>2</sub> (OH) <sub>6</sub> -organic bilayer SEI on the surface of the zinc anode | 16 |
| NH <sub>4</sub> V <sub>4</sub> O <sub>10</sub> | ZnSO <sub>4</sub>                                  | L-glutamine                        | 0.2~1.6 | ZnS and Gln formed a composite SEI, which inhibited the side reaction                                                                                            | 17 |

Table S4. Mechanism of electrostatic shielding electrolyte additives.

| Cathode                                        | Electrolyte       | Additive                         | Potential | Mechanism                                                                                                                                        | Ref |
|------------------------------------------------|-------------------|----------------------------------|-----------|--------------------------------------------------------------------------------------------------------------------------------------------------|-----|
| VO <sub>2</sub>                                | ZnSO <sub>4</sub> | Rb <sub>2</sub> SO <sub>4</sub>  | 0.2~1.6   | Rb <sup>+</sup> is preferentially adsorbed on the Zn surface, which produces a strong shielding effect                                           | 18  |
| α-MnO <sub>2</sub>                             | ZnSO <sub>4</sub> | TBA <sub>2</sub> SO <sub>4</sub> | 0.8~1.8   | TBA <sup>+</sup> electrostatically adsorbed on the surface of the zinc anode, shielding the electrolyte from hydrated Zn ions                    | 19  |
| NH <sub>4</sub> V <sub>4</sub> O <sub>10</sub> | ZnSO <sub>4</sub> | MBA                              | 0.2~1.6   | MBA regulates the molecular distribution on the surface of the zinc anode and prevents the decomposition of activated water                      | 20  |
| NH <sub>4</sub> V <sub>4</sub> O <sub>10</sub> | ZnSO <sub>4</sub> | B2AA                             | 0.2~1.6   | B2AA is preferentially adsorbed at the zinc anode interface, repelling reactive H <sub>2</sub> O, and inhibiting the                             | 21  |
| V <sub>2</sub> O <sub>5</sub>                  | ZnSO <sub>4</sub> | SA                               | 0.2~1.6   | Regulation of electric field distribution in the vicinity of zinc electrodes promotes uniform Zn <sup>2+</sup> deposition and transport kinetics | 22  |

Table S5. The classification of electrolyte additives working on the cathode.

| Cathode                                         | Electrolyte                                                                            | Additive                                           | Effect                                                                                                            | Performance                                                       | Ref |
|-------------------------------------------------|----------------------------------------------------------------------------------------|----------------------------------------------------|-------------------------------------------------------------------------------------------------------------------|-------------------------------------------------------------------|-----|
| ZnMn <sub>2</sub> O <sub>4</sub> (ZMO)          | ZnSO <sub>4</sub>                                                                      | MnSO <sub>4</sub>                                  | Electrochemical equilibrium between Mn <sup>2+</sup> and Zn <sup>2+</sup> promotes performance                    | 79 %<br>(2 A g <sup>-1</sup> 1000 cycles)                         | 23  |
| NaV <sub>3</sub> O <sub>8</sub>                 | ZnSO <sub>4</sub>                                                                      | Na <sub>2</sub> SO <sub>4</sub>                    | Na <sup>+</sup> possesses a lower reduction potential than Zn <sup>2+</sup> restricts the growth of Zn dendrites  | 90 % 221 mAh g <sup>-1</sup><br>(1 A g <sup>-1</sup> 100 cycles)  | 23  |
| MnO <sub>2</sub>                                | ZnSO <sub>4</sub>                                                                      | H <sub>2</sub> SO <sub>4</sub> +MnSO <sub>4</sub>  | Addition of H <sub>2</sub> SO <sub>4</sub> to the electrolyte to lower the pH and inhibit gas evolution           | —                                                                 | 24  |
| MgVO                                            | ZnSO <sub>4</sub>                                                                      | MgSO <sub>4</sub>                                  | Mg <sup>2+</sup> inhibits the continuous dissolution of active substances                                         | 90.3 %<br>(1 A g <sup>-1</sup> 200 cycles)                        | 11  |
| VOPO <sub>4</sub> ·H <sub>2</sub> O             | ZnCl <sub>2</sub>                                                                      | H <sub>3</sub> PO <sub>4</sub>                     | Dissolution of VOP is inhibited by the combination of PO <sub>4</sub> <sup>3-</sup> groups and zinc concentration | 170 mAh g <sup>-1</sup><br>(0.1 A g <sup>-1</sup> 500 cycles)     | 25  |
| K <sub>0.51</sub> V <sub>2</sub> O <sub>5</sub> | Zn (CF <sub>3</sub> SO <sub>3</sub> ) <sub>2</sub><br>KCF <sub>3</sub> SO <sub>3</sub> | Al (CF <sub>3</sub> SO <sub>3</sub> ) <sub>3</sub> | Co-embedding of Al and Zn to enhance crystal structure and inhibit dendrite growth                                | 91% 205 mAh g <sup>-1</sup><br>(0.1 A g <sup>-1</sup> 360 cycles) | 26  |

Table S6. The classification of multifunctional electrolyte additive mechanism.

| Cathode                          | Electrolyte                                        | Additive                                | Potential | Mechanism                                                                                                                                                                              | Ref |
|----------------------------------|----------------------------------------------------|-----------------------------------------|-----------|----------------------------------------------------------------------------------------------------------------------------------------------------------------------------------------|-----|
| PANI                             | ZnSO <sub>4</sub>                                  | 1-phenylethyl amine hydrochloride (PEA) | 0.8~1.4   | PEA modulates Zn <sup>2+</sup> solvation sheaths and generates a protective layer at the anode                                                                                         | 27  |
| V <sub>2</sub> O <sub>5</sub>    | Zn (CF <sub>3</sub> SO <sub>3</sub> ) <sub>2</sub> | Dextran                                 | 0.2~1.6   | The zinc surface forms a protective layer, and it promotes the gradual detachment of Zn (H <sub>2</sub> O) <sub>6</sub> <sup>2+</sup> , preferentially adsorbed on the Zn (0002) plane | 28  |
| V <sub>2</sub> O <sub>3</sub> /C | Zn (CF <sub>3</sub> SO <sub>3</sub> ) <sub>2</sub> | PEG 400                                 | 0.2~1.6   | PEG 400 modulates the structure of Zn <sup>2+</sup> solvation sheaths to achieve smaller lattice expansion of V <sub>2</sub> O <sub>3</sub> and inhibit side reactions                 | 29  |
| Al-V-O                           | Zn (CF <sub>3</sub> SO <sub>3</sub> ) <sub>2</sub> | Acetonitrile (AN)                       | 0.4~1.6   | AN interaction with Zn <sup>2+</sup> attenuates the H <sub>2</sub> O activity and                                                                                                      | 30  |

|                               |                   |                                                   |         |                                                                                                                                                                                                                                      |    |
|-------------------------------|-------------------|---------------------------------------------------|---------|--------------------------------------------------------------------------------------------------------------------------------------------------------------------------------------------------------------------------------------|----|
| V <sub>2</sub> O <sub>5</sub> | ZnSO <sub>4</sub> | Diethylenetriamine (DETA)                         | 0.2~1.6 | molecules are adsorbed on the anode surface to form a protective layer<br>Reshaping the structure of solvation sheaths in the electrolyte inhibits the solvation of active substances and induces crystal transitions at the cathode | 31 |
| MnO <sub>2</sub>              | ZnSO <sub>4</sub> | Nitrogen-doped and sulfonated carbon dots (NSCDs) | 0.8~1.8 | The abundance of polar groups in CDs reduces the amount of reactive H <sub>2</sub> O, and part of the negatively charged NSCDs adsorbs on the surface of the Zn anode to inhibit corrosion                                           | 32 |

Table S7. Electrolyte additives optimize the performance mechanism of AZIBs at extreme temperatures

| Cathode                  | Electrolyte                         | Additive                            | Temperature | Mechanism                                                                                                                                                                                                    | Ref |
|--------------------------|-------------------------------------|-------------------------------------|-------------|--------------------------------------------------------------------------------------------------------------------------------------------------------------------------------------------------------------|-----|
| PANI                     | ZnCl <sub>2</sub>                   | $\alpha$ -D-glucose ( $\alpha$ DG)  | -25 °C      | The $\alpha$ DG hydroxyl-rich structure breaks hydrogen bonds to obtain a low freezing point of -55.3 °C                                                                                                     | 33  |
| MnO <sub>2</sub>         | ZnSO <sub>4</sub>                   | N, N-dimethyl acetamide (DMA)       | -18°C       | DMA solvent additives with high donor number tend to limit free water distribution, rebuild the ligand H <sub>2</sub> O network in the environment and lower the freezing point                              | 34  |
| MnO <sub>2</sub>         | ZnSO <sub>4</sub>                   | Ethylene glycol                     | -25 °C      | Hydroxyl groups on EG improve the antifreeze ability of aqueous electrolytes and improve the conductivity of electrolytes at low temperatures                                                                | 35  |
| MnO <sub>2</sub>         | ZnSO <sub>4</sub>                   | Dimethyl sulfoxide (DMSO)           | -20 °C      | Stable reconstituted hydrogen bonding between DMSO and H <sub>2</sub> O lowers the freezing point of the electrolyte, thereby increasing the ionic conductivity of the aqueous cell at sub-zero temperatures | 36  |
| Pyrene-4,5,9,10-tetraone | Zn (ClO <sub>4</sub> ) <sub>2</sub> | Mg (ClO <sub>4</sub> ) <sub>2</sub> | -70 °C      | Disruption of hydrogen bonding networks of water molecules by the synergistic action of cations                                                                                                              | 11  |

(PTO)

and anions

Table S8. Practical application of advanced characterization techniques to AZIBs electrolyte additives.

| Electrolyte       | Additive                               | Characterization technique | Characterization purpose                                                                                                                                    | Ref |
|-------------------|----------------------------------------|----------------------------|-------------------------------------------------------------------------------------------------------------------------------------------------------------|-----|
| ZnSO <sub>4</sub> | Tripropylene glycol (TG)               | <i>In-situ FTIR</i>        | Reversible displacement of O-H stretching vibrations at 3200 cm <sup>-1</sup> for de-solvation sheaths                                                      | 9   |
| ZnSO <sub>4</sub> | Cetyltrimethyl ammonium bromide (CTAB) | <i>In-situ FTIR</i>        | The stretching intensity of O-H located at 3200-3600 cm <sup>-1</sup> is weakened and the surface zinc deposition process de-solvation sheaths are achieved | 10  |
| ZnSO <sub>4</sub> | Sorbitol                               | <i>Operando Raman</i>      | Zn-OH <sub>2</sub> vibrations could be observed in the 300-500 cm <sup>-1</sup> region to detect zinc deposition                                            | 37  |
| ZnSO <sub>4</sub> | Sucrose                                | FT-EXAFS                   | The spectrum further surfaces an increase in Zn-O bond lengths, expanding the Zn <sup>2+</sup> solvation shells                                             | 38  |
| ZnSO <sub>4</sub> | Tetradecafluorononane-1,9-diol (TDFND) | CLSM                       | CLSM scanning of the surface roughness of the anode after cycling demonstrated the uniform deposition of zinc with the addition of additives                | 39  |

### References:

- 1 K. Ouyang, S. Chen, W. Ling, M. Cui, Q. Ma, K. Zhang, P. Zhang and Y. Huang, *Angewandte Chemie - International Edition*, , DOI:10.1002/anie.202311988.
- 2 H. Li, L. Yang, S. Zhou, J. Li, Y. Chen, X. Meng, D. Xu, C. Han, H. Duan and A. Pan, *Advanced Functional Materials*, 2024, **2313859**, 1–9.
- 3 W. Zhang, Y. Dai, R. Chen, Z. Xu, J. Li, W. Zong, H. Li, Z. Li, Z. Zhang, J. Zhu, F. Guo, X. Gao, Z. Du, J. Chen, T. Wang, G. He and I. P. Parkin, *Angewandte Chemie - International Edition*, , DOI:10.1002/anie.202212695.
- 4 D. Han, Z. Wang, H. Lu, H. Li, C. Cui, Z. Zhang, R. Sun, C. Geng, Q. Liang, X. Guo, Y. Mo, X. Zhi, F. Kang, Z. Weng and Q. H. Yang, *Advanced Energy Materials*, , DOI:10.1002/aenm.202102982.
- 5 C. Lin, X. Yang, P. Xiong, H. Lin, L. He, Q. Yao, M. Wei, Q. Qian, Q. Chen and L. Zeng, *Advanced Science*, 2022, **9**, 1–10.
- 6 J. Zhu, W. Deng, N. Yang, X. Xu, C. Huang, Y. Zhou, M. Zhang, X. Yuan, J. Hu, C. Li and R. Li, *Small*, 2022, **18**, 1–10.
- 7 J. Chen, W. Zhou, Y. Quan, B. Liu, M. Yang, M. Chen, X. Han, X. Xu, P. Zhang

- and S. Shi, *Energy Storage Materials*, 2022, **53**, 629–637.
- 8 T. C. Li, Y. Von Lim, X. L. Li, S. Luo, C. Lin, D. Fang, S. Xia, Y. Wang and H. Y. Yang, *Advanced Energy Materials*, 2022, **12**, 1–9.
- 9 Z. Liu, R. Wang, Q. Ma, J. Wan, S. Zhang, L. L. Zhang, H. Li, Q. Luo, J. Wu, T. Zhou, J. Mao, L. L. Zhang, C. Zhang and Z. Guo, *Advanced Functional Materials*, 2023, **2214538**, 1–13.
- 10 Z. Liu, R. Wang, Y. Gao, S. Zhang, J. Wan, J. Mao, L. L. Zhang, H. Li, J. Hao, G. Li, L. L. Zhang and C. Zhang, *Advanced Functional Materials*, 2023, **33**, 1–10.
- 11 T. Sun, S. Zheng, H. Du and Z. Tao, *Nano-Micro Letters*, 2021, **13**, 1–10.
- 12 J. Weng, W. Zhu, K. Yu, J. Luo, M. Chen, L. Li, Y. Zhuang, K. Xia, Z. Lu, Y. Hu, C. Yang, M. Wu and Z. Zou, *Advanced Functional Materials*, 2024, **2314347**, 1–13.
- 13 A. Naveed, T. Li, A. Ali, F. Ahmad, W. A. Qureshi, M. Su, X. Li, Y. Zhou, J. C. Wu and Y. Liu, *Small*, 2024, **2401589**, 1–10.
- 14 N. Wang, X. Chen, H. Wan, B. Zhang, K. Guan, J. Yao, J. Ji, J. Li, Y. Gan, L. Lv, L. Tao, G. Ma, H. Wang, J. Zhang and H. Wang, *Advanced Functional Materials*, 2023, **33**, 1–11.
- 15 Z. Zha, T. Sun, D. Li, T. Ma, W. Zhang and Z. Tao, *Energy Storage Materials*, 2024, **64**, 103059.
- 16 D. Li, L. Cao, T. Deng, S. Liu and C. Wang, *Angewandte Chemie*, 2021, **133**, 13145–13151.
- 17 T. Yan, S. Liu, J. Li, M. Tao, J. Liang, L. Du, Z. Cui and H. Song, *ACS Nano*, 2024, **18**, 3752–3762.
- 18 X. Zhang, J. Chen, H. Cao, X. Huang, Y. Liu, Y. Chen, Y. Huo, D. Lin, Q. Zheng and K. ho Lam, *Small*, 2023, **19**, 1–8.
- 19 A. Bayaguud, X. Luo, Y. Fu and C. Zhu, *ACS Energy Letters*, 2020, **5**, 3012–3020.
- 20 T. Yan, M. Tao, J. Liang, G. Zheng, B. Wu, L. Du, Z. Cui and H. Song, *Energy Storage Materials*, , DOI:10.1016/j.ensm.2024.103190.
- 21 Z. Wang, Z. Hu, M. Ye, J. Chen, Y. Chen, Z. Wen, Y. Zhang, Y. Tang, X. Liu and C. C. Li, *Chemical Engineering Journal*, 2024, **481**, 148511.
- 22 Y. Yang, H. Hua, Z. Lv, M. Zhang, C. Liu, Z. Wen, H. Xie, W. He, J. Zhao and C. C. Li, *Advanced Functional Materials*, , DOI:10.1002/adfm.202212446.
- 23 V. Soundharrajan, B. Sambandam, S. Kim, S. Islam, J. Jo, S. Kim, V. Mathew, Y. kook Sun and J. Kim, *Energy Storage Materials*, 2020, **28**, 407–417.
- 24 C. F. Bischoff, O. S. Fitz, J. Burns, M. Bauer, H. Gentscher, K. P. Birke, H.-M. Henning and D. Biro, *Journal of The Electrochemical Society*, 2020, **167**, 020545.
- 25 H. Y. Shi, Y. Song, Z. Qin, C. Li, D. Guo, X. X. Liu and X. Sun, *Angewandte Chemie - International Edition*, 2019, **58**, 16057–16061.
- 26 G. Y. & C. W. Xianlin Zhou, Kaixuan Ma, Qianyu Zhang, 2022, **15**, 8039–8047.
- 27 M. Wang, Y. Cheng, H. Zhao, J. Gao, J. Li, Y. Wang, J. Qiu, H. Zhang, X. Chen and Y. Wei, *Small*, 2023, **19**, 1–9.
- 28 J. Li, Z. Guo, J. Wu, Z. Zheng, Z. Yu, F. She, L. Lai, H. Li, Y. Chen and L. Wei,

- Advanced Energy Materials*, 2023, **13**, 1–10.
- 29 Y. Chen, D. Ma, K. Ouyang, M. Yang, S. Shen, Y. Wang, H. Mi, L. Sun, C. He and P. Zhang, *Nano-Micro Letters*, 2022, **14**, 1–18.
- 30 C. Meng, W. He, Z. Kong, Z. Liang, H. Zhao, Y. Lei, Y. Wu and X. Hao, *Chemical Engineering Journal*, 2022, **450**, 138265.
- 31 X. Gong, H. Yang, J. Wang, G. Wang and J. Tian, *ACS Applied Materials and Interfaces*, 2023, **15**, 4152–4165.
- 32 T. B. Song, Z. H. Huang, X. R. Zhang, J. W. Ni and H. M. Xiong, *Small*, , DOI:10.1002/sml.202205558.
- 33 F. Bu, Y. Gao, W. Zhao, Q. Cao, Y. Deng, J. Chen, J. Pu, J. Yang, Y. Wang, N. Yang, T. Meng, X. Liu and C. Guan, *Angewandte Chemie*, , DOI:10.1002/ange.202318496.
- 34 W. Deng, Z. Xu and X. Wang, *Energy Storage Materials*, 2022, **52**, 52–60.
- 35 T. Nguyen Thanh Tran, M. Zhao, S. Geng and D. G. Ivey, *Batteries and Supercaps*, 2022, **5**, 1–8.
- 36 D. Feng, F. Cao, L. Hou, T. Li, Y. Jiao and P. Wu, *Small*, 2021, **17**, 1–11.
- 37 Y. Quan, M. Yang, M. Chen, W. Zhou, X. Han, J. Chen, B. Liu, S. Shi and P. Zhang, *Chemical Engineering Journal*, 2023, **458**, 141392.
- 38 H. Dou, X. Wu, M. Xu, R. Feng, Q. Ma, D. Luo, K. Zong, X. Wang and Z. Chen, *Angewandte Chemie*, , DOI:10.1002/ange.202401974.
- 39 T. Li, S. Hu, C. Wang, D. Wang, M. Xu, C. Chang, X. Xu and C. Han, *Angewandte Chemie - International Edition*, , DOI:10.1002/anie.202314883.
